# Supplementary material
Source: PubMed Central journal article supplement (PMC3351143)
Supplement: NIHMS361509-supplement-1_si_001.pdf [file NIHMS361509-supplement-1_si_001.pdf]

# Conformation Types of Ubiquitin $[M+8H]^{8+}$ Ions from Water:Methanol Solutions: Evidence for the N and A States in Aqueous Solution

Huilin Shi, Nicholas A. Pierson, Stephen J. Valentine, and David E. Clemmer\*

*Department of Chemistry, Indiana University  
800 Kirkwood Ave. Bloomington, IN 47405*

## Supplementary Figure Captions

**Figure 1.** Mass spectra of ubiquitin ions electrosprayed from six different water:methanol solutions. Solution composition (water:methanol) is listed for each spectrum. The charge states of ubiquitin ions are labeled above the corresponding peaks.

**Figure 2.** Collision cross section (ccs) distributions for  $[M+8H]^{8+}$  ubiquitin ions electrosprayed from twenty water:methanol solutions. Solution compositions (water:methanol) are labeled for each of the distribution. The data sets have been normalized by the integrated peak intensity.

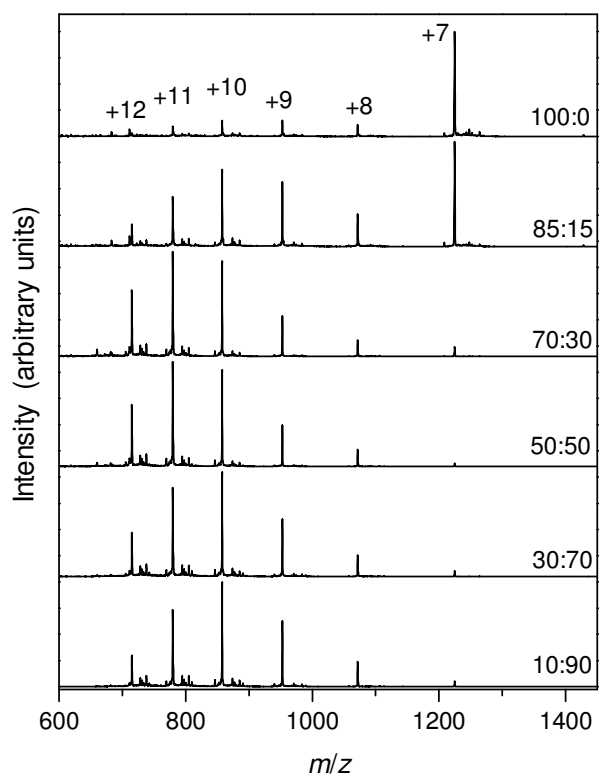

Supplementary Figure 1

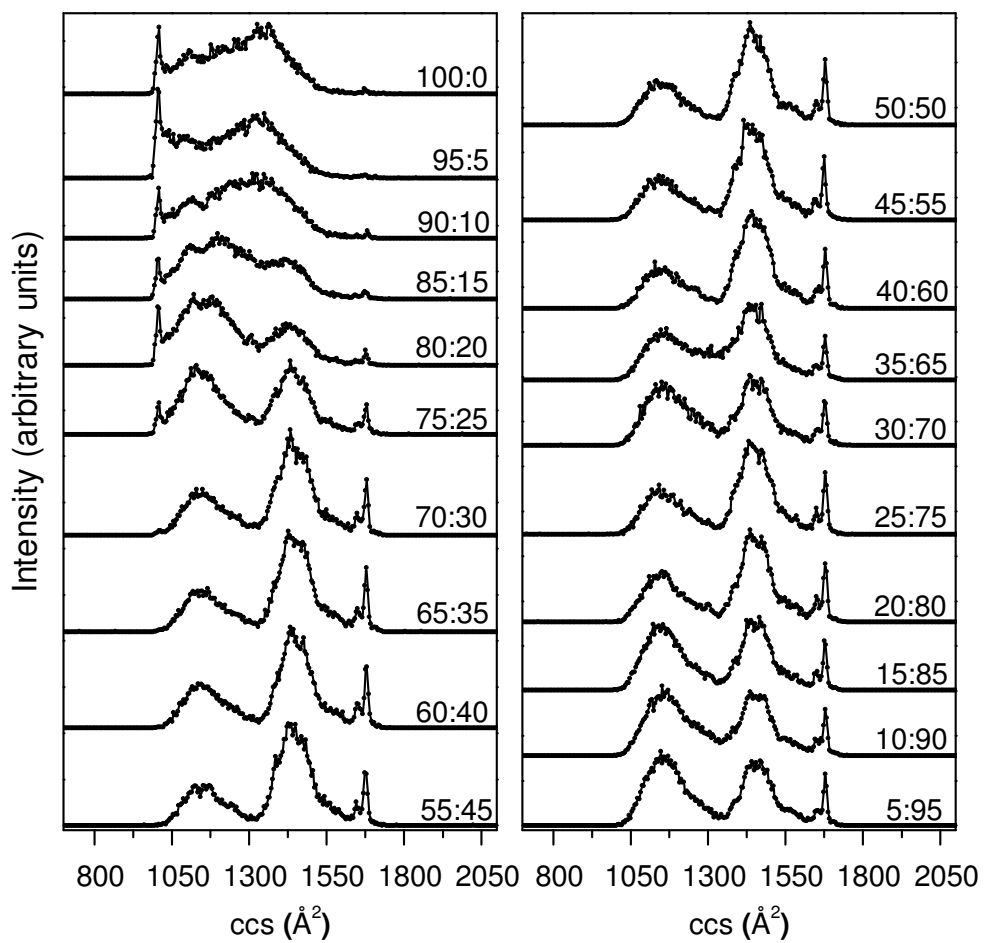

Supplementary Figure 2
